# Supplementary material for: UV light-blocking contact lenses protect against short-term UVB-induced limbal stem cell niche damage and inflammation
Source: PubMed Central journal article supplement (PMC6105637; doi:10.1038/s41598-018-30021-8), 2018-08-22
Supplement: 41598_2018_30021_MOESM1_ESM.pdf [file 41598_2018_30021_MOESM1_ESM.pdf]

## **Supplementary Figure**

**UV light-blocking contact lenses protect against short-term UVB-induced limbal stem cell niche damage and inflammation**

**Notara M<sup>1</sup>, PhD; Behboudifard S<sup>1</sup>, Ms; Kluth MA<sup>2,3</sup>, PhD; Maßlo C<sup>2,3</sup>, PhD; Ganss C<sup>2,3</sup>, MD; Frank MH<sup>4,5,6</sup>, MD; Schumacher B<sup>7,8</sup>, PhD; Cursiefen C, MD<sup>1,8</sup>**

**1. Dept. of Ophthalmology, University of Cologne, Germany**

**2. TICEBA GmbH, Im Neuenheimer Feld 517, Heidelberg, Germany**

**3. RHEACELL GmbH & Co. KG, Im Neuenheimer Feld 517, Heidelberg, Germany**

**4. Transplant Research Program, Boston Children's Hospital, Harvard Medical School, Boston, MA, USA**

**5. Harvard Stem Cell Institute, Harvard University, Cambridge, MA, USA**

**6. School of Medical Sciences, Edith Cowan University, Joondalup, WA, Australia**

**7. Institute for Genome Stability in Ageing and Disease, CECAD Research Center, Joseph-Stelzmann-Str. 26, 50931, Cologne, Germany.**

**8. Center for Molecular Medicine Cologne (CMMK), University of Cologne, Germany**

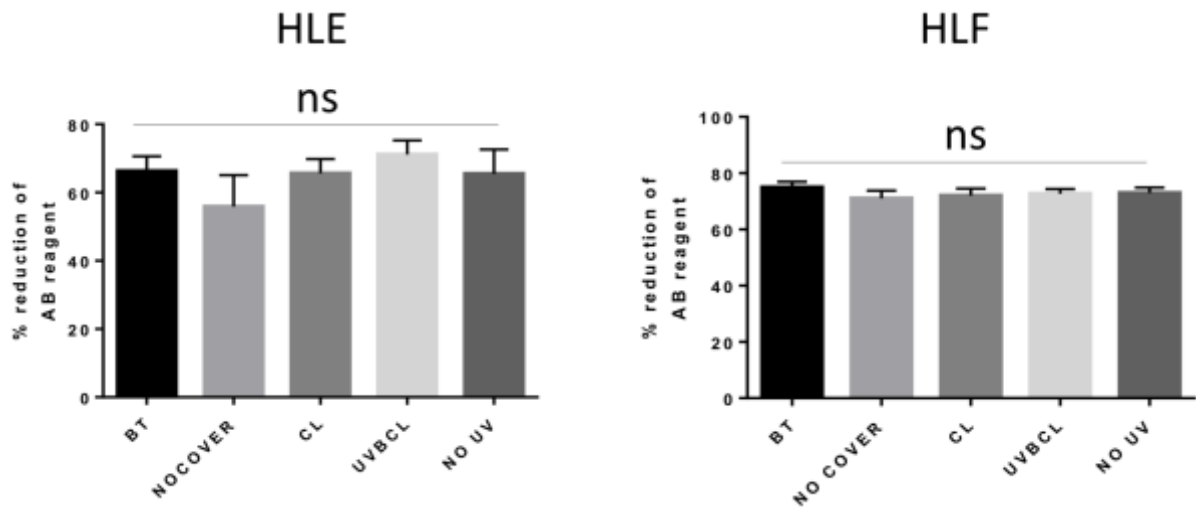

**Supplementary Figure 1. The metabolic activity of limbal epithelial cells and fibroblasts remains unchanged following a UVB irradiation dose of 20mJ/cm<sup>2</sup>.**

Alamar blue assay in limbal epithelial cells (A) and fibroblasts (B), 24h following UVB irradiation demonstrated that cell viability is not affected by a UVB dose of 20mJ/cm<sup>2</sup>.
